# Supplementary material for: Hypolipidemic effects of protein hydrolysates from Trachinotus ovatus and identification of peptides implied in bile acid-binding activity using LC-ESI-Q-TOF-MS/MS
Source: Royal Society of Chemistry journal article supplement (doi:10.1039/d0ra02428g), 2020-01-01
Supplement: d0ra02428g1.pdf [file d0ra02428g1.pdf]

## Supplemental materials

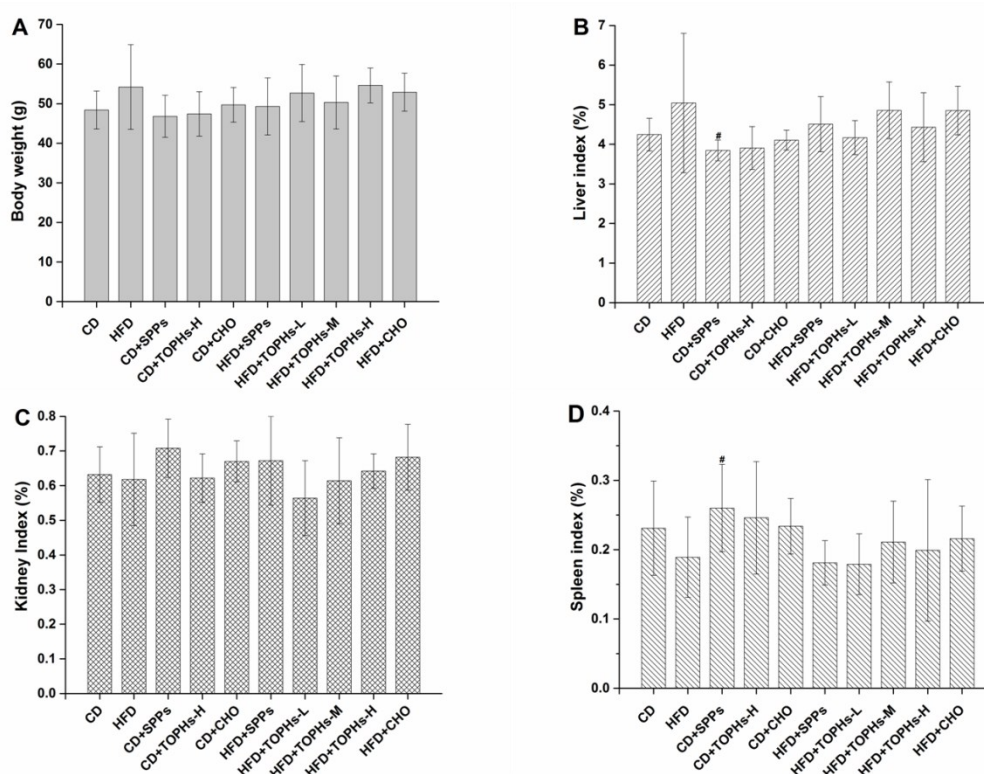

**Figure S1.** Effects of TOPHs on body weight and organ indices in mice. (A) body weight. (B) liver index. (C) kidney index. (D) spleen index. Values are expressed as the mean  $\pm$  SD of six mice in each group. Significant differences were observed between the treatment groups ( $\#p < 0.05$ ). CD group: mice were fed daily with a standard diet and gavaged with deionized water at a dose of 1 ml daily for 8 weeks. HFD group: mice were fed daily with the high-fat diet and gavaged daily with 1 ml of deionized water. CD+SPPs group: mice were fed daily with a standard diet and treated with SPPs by gastric gavage daily at a dose of 2 g/kg body weight. CD+TOPHs-H group: mice were fed daily with a standard diet and treated with TOPHs by gastric gavage daily at a dose of 5 g/kg body weight. CD+CHO group: mice were fed daily with a standard diet and administered cholestyramine at a daily dose of 0.2 g/kg body weight. HFD+SPPs group: mice were fed daily with the high-fat diet and treated with SPPs at a daily dose of 2.0 g/kg body weight. HFD+TOPHs-L, HFD+TOPHs-M and HFD+TOPHs-H groups: mice were fed daily with the high-fat diet and treated daily with TOPHs by gastric gavage at a dose of 0.5 g/kg, 2.5 g/kg and 5.0 g/kg body weight, respectively. HFD+CHO group: mice were fed daily with the high-fat diet and treated with cholestyramine at a daily dose of 0.2 g/kg body weight.

**Table S1.** The peptide sequences identified in the TOPHs-5 fraction using LC-ESI-Q-TOF-MS/MS.

| NO.  | RT (time) | Sequence           | Observed <sup>a</sup> (m/z) | Charge state (+) <sup>b</sup> | Calculated <sup>c</sup> (Mr) | pI <sup>d</sup> | Hydrophobicity <sup>d</sup> |
|------|-----------|--------------------|-----------------------------|-------------------------------|------------------------------|-----------------|-----------------------------|
| Fr.1 |           |                    |                             |                               |                              |                 |                             |
| 1    | 7.35      | ITGESQ GK          | 819.4206                    | 1                             | 818.4134                     | 6.98            | 12.50%                      |
| 2    | 8.52      | ATVETDGGK          | 877.4266                    | 1                             | 876.4189                     | 4.07            | 22.22%                      |
| 3    | 12.13     | AELSEGK            | 733.372                     | 1                             | 732.3654                     | 4.26            | 28.57%                      |
| 4    | 12.34     | AAADGPMK           | 760.3665                    | 1                             | 759.3585                     | 6.71            | 62.50%                      |
| 5    | 12.84     | TNGPPTSL           | 786.3726                    | 1                             | 785.3919                     | 6.4             | 37.50%                      |
| 6    | 13.65     | APALEGA            | 628.3661                    | 1                             | 627.3228                     | 3.34            | 71.43%                      |
| 7    | 15.03     | EAGEGGV            | 618.32                      | 1                             | 617.2657                     | 3.11            | 28.57                       |
| 8    | 17.88     | ALGQNPTNK          | 942.5007                    | 1                             | 941.493                      | 10.05           | 33.33%                      |
| 9    | 18.68     | EQDTQGLVAPK        | 593.2765                    | 2                             | 1184.6037                    | 4.07            | 36.36%                      |
| 10   | 18.82     | TASPQQAQEVHEK      | 726.8598                    | 2                             | 1451.7005                    | 5.3             | 30.77%                      |
| 11   | 18.88     | LGVAAGA            | 558.3619                    | 1                             | 557.3173                     | 6.02            | 71.43%                      |
| 12   | 20.05     | VQHEMEEAQR         | 693.3106                    | 2                             | 1384.6041                    | 4.25            | 27.27%                      |
| 13   | 21.98     | IDTGAPD            | 344.6854                    | 2                             | 687.3075                     | 2.81            | 42.86%                      |
| 14   | 24.92     | AILGGTG            | 588.373                     | 1                             | 587.3279                     | 5.98            | 42.86%                      |
| 15   | 25.01     | IHFGTSGK           | 846.4499                    | 1                             | 845.4396                     | 10.14           | 25%                         |
| 16   | 25.48     | GPAGAQQAVGSPGPK    | 625.8298                    | 2                             | 1249.6415                    | 10.05           | 46.67%                      |
| 17   | 27.30     | ADIAESQV NK        | 537.7763                    | 2                             | 1073.5353                    | 4.07            | 40.00%                      |
| 18   | 27.50     | SKYETDAIQR         | 605.8085                    | 2                             | 1209.5989                    | 6.75            | 20%                         |
| 19   | 28.30     | DSYVGDEA QSK       | 599.7667                    | 2                             | 1197.515                     | 3.7             | 18.18%                      |
| 20   | 28.57     | ELSASDK            | 749.3695                    | 1                             | 748.3603                     | 4.07            | 28.57%                      |
| 21   | 29.63     | HQGV MVGMGQK       | 1171.5731                   | 1                             | 1170.5638                    | 9.84            | 36.36%                      |
| 22   | 30.52     | KDFPKSPK           | 946.463                     | 1                             | 945.5284                     | 10.24           | 37.50%                      |
| 23   | 31.75     | EIESLER            | 875.4477                    | 1                             | 874.4396                     | 3.96            | 28.57%                      |
| 24   | 32.95     | AGFAGDDAPR         | 488.729                     | 2                             | 975.441                      | 3.88            | 50%                         |
| 25   | 33.05     | ANALAA NLDKK       | 564.8228                    | 2                             | 1127.6298                    | 9.85            | 54.55%                      |
| 26   | 34.28     | EQVAMVER           | 961.4809                    | 1                             | 960.4698                     | 4.26            | 50%                         |
| 27   | 37.72     | GNPGAAGASGAQQPIGPR | 767.8915                    | 2                             | 1533.7648                    | 11.04           | 44.44%                      |
| 28   | 40.75     | TGDGVNDAPALK       | 579.2939                    | 2                             | 1156.5724                    | 3.88            | 41.67%                      |

|    |       |                          |           |   |           |       |        |
|----|-------|--------------------------|-----------|---|-----------|-------|--------|
| 29 | 40.83 | VLGSGTNLDSAR             | 595.3149  | 2 | 1188.6099 | 6.8   | 33.33% |
| 30 | 40.95 | INEMLDTK                 | 482.2462  | 2 | 962.4743  | 4.07  | 37.50% |
| 31 | 41.25 | FQSINAENTENR             | 776.3577  | 2 | 1550.6961 | 3.96  | 23.08% |
| 32 | 41.27 | ILGNPSADDMANKR           | 501.2554  | 3 | 1500.7354 | 6.93  | 42.86% |
| 33 | 41.85 | AGLDPAGQQAMR             | 607.8045  | 2 | 1213.5873 | 6.74  | 50%    |
| 34 | 43.18 | ANALANLNDK               | 1000.5443 | 1 | 999.5349  | 6.71  | 60%    |
| 35 | 45.49 | ATDAEGDVASLNR            | 659.8176  | 2 | 1317.6161 | 3.7   | 38.46% |
| 36 | 46.30 | ILGNPSADDMANK            | 673.3275  | 2 | 1344.6343 | 3.88  | 46.15% |
| 37 | 47.53 | ENQSVLITGESGAGK          | 745.3822  | 2 | 1488.742  | 4.26  | 26.67% |
| 38 | 49.15 | VIADNVKDWSK              | 637.8437  | 2 | 1273.6666 | 6.89  | 45.45% |
| 39 | 49.75 | ITALAPSTMK               | 516.7935  | 2 | 1031.5685 | 10.13 | 60%    |
| 40 | 50.24 | GILAADESTGSVAK           | 659.8494  | 2 | 1317.6776 | 4.07  | 42.86% |
| 41 | 50.34 | LDEAENLAMK               | 567.2811  | 2 | 1132.5434 | 3.83  | 50%    |
| 42 | 50.48 | VGAAGPAGIVPPGPAGPSGKDGPR | 713.7179  | 3 | 2138.1233 | 10.11 | 52%    |
| 43 | 50.55 | VAEQELVDASER             | 673.3375  | 2 | 1344.6521 | 3.68  | 41.67% |
| 44 | 50.75 | SDLATALAK                | 889.5025  | 1 | 888.4916  | 6.51  | 55.56% |
| 45 | 50.76 | ILGNPTADDMANK            | 680.3353  | 2 | 1358.65   | 3.88  | 46.15% |
| 46 | 51.25 | LEEAGGATAAQIEMNK         | 816.9012  | 2 | 1631.7824 | 3.96  | 43.75% |
| 47 | 51.35 | LQDAEESIEAVNSK           | 766.8771  | 2 | 1531.7365 | 3.68  | 35.71% |
| 48 | 51.47 | IEDEQSLGAQLQK            | 729.8776  | 2 | 1457.7362 | 3.83  | 30.77% |
| 49 | 51.83 | VQLELNQVK                | 1070.6247 | 1 | 1069.6131 | 6.96  | 44.44% |
| 50 | 51.99 | EITALAPSTMK              | 1161.6195 | 1 | 1160.6111 | 6.94  | 54.55% |
| 51 | 52.13 | GEAIDSMIPAQK             | 630.3184  | 2 | 1258.6227 | 4.07  | 50%    |
| 52 | 52.30 | GTYYDDYVEGLR             | 644.2966  | 2 | 1286.5779 | 3.7   | 18.18% |
| 53 | 52.33 | VMDSMQSTLDAEVR           | 791.3677  | 2 | 1580.7174 | 3.7   | 42.86% |
| 54 | 52.52 | LVIIEGDLER               | 578.8324  | 2 | 1155.6499 | 3.83  | 50%    |
| 55 | 52.77 | SYELPDGQVITIGNER         | 895.9484  | 2 | 1789.8846 | 3.83  | 31.25% |
| 56 | 53.04 | EITALAPSTM               | 1033.5209 | 1 | 1032.5161 | 3.27  | 60%    |
| 57 | 53.09 | DVLASMGQLNVK             | 637.8411  | 2 | 1273.67   | 6.81  | 50%    |
| 58 | 53.14 | SSIFDAGAGIALNDHFVK       | 931.4741  | 2 | 1860.937  | 5.1   | 50%    |
| 59 | 53.51 | YVDIVVLK                 | 948.5015  | 1 | 947.5692  | 6.47  | 62.50% |
| 60 | 53.80 | LNFDAFLPMLK              | 654.8532  | 2 | 1307.6948 | 6.71  | 72.73% |

|      |       |                          |          |   |           |       |        |
|------|-------|--------------------------|----------|---|-----------|-------|--------|
| 61   | 53.98 | VINDNFGIVEGLMSTVHAITATQK | 853.447  | 3 | 2557.321  | 5.22  | 45.83% |
| 62   | 54.08 | VINDNFGIVEGLMTTVHAVTATQK | 853.4457 | 3 | 2557.321  | 5.22  | 45.83% |
| Fr.2 |       |                          |          |   |           |       |        |
| 1    | 0.57  | SAGNTIQKR                | 974.8154 | 1 | 973.5305  | 11.51 | 22.22% |
| 2    | 10.55 | AGEGGGA                  | 518.2369 | 1 | 517.2132  | 3.34  | 28.57% |
| 3    | 28.34 | DHAVASS                  | 686.2773 | 1 | 685.3031  | 4.94  | 42.86% |
| 4    | 54.74 | GTYYDYVEGLR              | 644.3015 | 2 | 1286.5779 | 3.7   | 18.18% |
| 5    | 54.94 | LVTWYDNEFGYSNR           | 882.4125 | 2 | 1762.7951 | 4.07  | 28.57% |
| 6    | 54.99 | SFPLAEFL                 | 923.5041 | 1 | 922.48    | 3.31  | 75%    |
| 7    | 55.87 | LNFD AFLPMLK             | 654.8566 | 2 | 1307.6948 | 6.71  | 72.73% |

<sup>a</sup> Molecular ion mass observed in the LC-ESI-Q-TOF-MS/MS system in mass/charge (m/z).

<sup>b</sup> [M+H]<sup>+</sup> was the charge of the ion.

<sup>c</sup> Calculated relative molecular mass in Da.

<sup>d</sup> Calculated according to "Peptide2.0"(<http://peptide2.com>).
